# Supplementary material
Source: HighWire-hosted journal article supplement (https://erj.ersjournals.com/content/52/2/1701927)
Supplement: inline-supplementary-material-1 [file inline-supplementary-material-1.pdf]

## **Prevalence, characteristics and management of frequently exacerbating asthma patients: an observational study in Sweden (PACEHR)**

Christer Janson<sup>1</sup>, Karin Lisspers<sup>2</sup>, Björn Stållberg<sup>2</sup>, Gunnar Johansson<sup>2</sup>, Marcus Thuresson<sup>3</sup>, Gunilla Telg<sup>4</sup>, Kjell Larsson<sup>5</sup>

1. Department of Medical Sciences, Respiratory, Allergy and Sleep Research, Uppsala University, Sweden 2. Public Health and Caring Science, Family Medicine and Preventive Medicine, Uppsala University, Sweden; 2. Department of Medical Sciences, Respiratory, Allergy and Sleep Research, Uppsala University, Sweden; 3. Statisticon AB, Uppsala, Sweden; 4. AstraZeneca Nordic-Baltic, Södertälje, Sweden; 5. The National Institute of Environmental Medicine, Karolinska Institutet, Sweden

Online Data Supplement

**SUPPL Table S1.** Percentage of patients without concomitant COPD diagnosis collecting at least one claim of asthma medication at baseline and during follow-up, grouped by patients with and without frequent exacerbations during the observation period.

|                                          | No exacerbations<br>n=11182 |           |                  | Frequent exacerbations<br>n=219 |           |                   |
|------------------------------------------|-----------------------------|-----------|------------------|---------------------------------|-----------|-------------------|
|                                          | Before                      | Follow-up | OR* (95% CI)     | Before                          | Follow-up | OR* (95% CI)      |
| Short-acting $\beta$ 2-agonists, %       | 27.9                        | 33.7      | 1.62 (1.50-1.75) | 60.7                            | 67.1      | 1.74 (0.96-3.23)  |
| Long-acting $\beta$ 2-agonists (LABA), % | 8.4                         | 9.4       | 1.37 (1.17-1.59) | 20.1                            | 26.0      | 3.17 (1.22-9.69)  |
| Inhaled corticosteroids (ICS), %         | 26.8                        | 30.9      | 1.54 (1.42-1.68) | 40.6                            | 45.2      | 1.59 (0.83-3.11)  |
| Fixed ICS/LABA combination, %            | 20.1                        | 23.4      | 1.77 (1.58-1.98) | 47.0                            | 53.0      | 1.93 (0.98-3.98)  |
| Any Inhaled corticosteroid, %            | 45.3                        | 52.6      | 1.85 (1.71-2.00) | 79.0                            | 88.1      | 3.22 (1.49-7.74)  |
| Leukotriene receptor antagonists, %      | 3.7                         | 4.0       | 1.29 (1.03-1.62) | 25.1                            | 33.8      | 4.17 (1.67-12.42) |
| Long acting anticholinergics, %          | 80.8                        | 1.3       | 3.07 (2.01-4.80) | 3.7                             | 7.3       | 5.00 (1.07-46.93) |

\*OR - Odds ratios refers to the ratio of the odds of changing category within patient (from no to yes, vs yes to no)

**SUPPL Table S2.** Health care utilisation at baseline and during the 3-year observation period in patients without concomitant COPD diagnosis, grouped by patients that have frequent exacerbations and those without exacerbations

|                                   | No exacerbations<br>n=11182 |           |                  | Frequent exacerbations<br>n=219 |           |                  |
|-----------------------------------|-----------------------------|-----------|------------------|---------------------------------|-----------|------------------|
|                                   | Before                      | Follow-up | OR* (95% CI)     | Before                          | Follow-up | OR* (95% CI)     |
| <b>Primary care</b>               |                             |           |                  |                                 |           |                  |
| Doctor visits, %                  | 56.8                        | 47.1      | 0.52 (0.48-0.56) | 68.5                            | 59.4      | 0.39 (0.19-0.77) |
| Doctor visit due of asthma, %     | 18.0                        | 10.4      | 0.45 (0.41-0.50) | 35.2                            | 31.5      | 0.76 (0.43-1.31) |
| <b>Secondary care</b>             |                             |           |                  |                                 |           |                  |
| Outpatient visit, %               | 14.0                        | 11.9      | 0.76 (0.69-0.83) | 50.7                            | 47.9      | 0.82 (0.48-1.40) |
| Outpatient visit due to asthma, % | 3.9                         | 2.1       | 0.43 (0.36-0.53) | 28.8                            | 23.3      | 0.57 (0.29-1.09) |
| Hospitalisation, all cause, %     | 6.0                         | 5.8       | 0.95 (0.84-1.07) | 21.9                            | 22.4      | 1.03 (0.61-1.77) |
| Hospitalisation due to asthma, %  | 0.0                         | 0.0       | NA (0.00-Inf)    | 4.6                             | 3.7       | 0.75 (0.21-2.46) |

\*OR - Odds ratios refers to the ratio of the odds of changing category within patient (from no to yes, vs yes to no)

**SUPPL Table S3.** Characteristics of patients without concurrent COPD diagnosis, patients without any exacerbations compared with those with frequent exacerbations every year during the observational period

|                                                      | No exacerbations<br>n=11182 | Frequent<br>exacerbations<br>n=219 | p-<br>value* |
|------------------------------------------------------|-----------------------------|------------------------------------|--------------|
| Age, mean (sd)                                       | 45.3 (18.4)                 | 53.4 (16.9)                        | <0.001       |
| Female, n (%)                                        | 6767 (60.5%)                | 153 (69.9%)                        | 0.004        |
| Neutrophils, cells/mm <sup>3</sup> , mean (sd), n    | 4.79 (2.37), 852            | 5.26 (1.99), 50                    | 0.176        |
| Eosinophils, x10 <sup>3</sup> cells/μL, mean (sd), n | 0.29 (0.34), 1464           | 0.39 (0.43), 72                    | 0.012        |
| BMI, mean (sd), n                                    | 27.5 (6.0), 5625            | 27.1 (5.1), 116                    | 0.474        |
| FEV1 % predicted, (sd), n                            | 91.1 (16.0), 745            | 82.0 (14.7), 22                    | 0.008        |
| FVC % predicted, (sd), n                             | 99.0 (16.0), 672            | 91.4 (14.7), 13                    | 0.087        |
| Rhinitis/sinusitis, n (%)                            | 2458 (22.0%)                | 67 (30.6%)                         | 0.003        |
| Non-allergic rhinitis, n (%)                         | 506 (4.5%)                  | 13 (5.9%)                          | 0.342        |
| Allergic rhinitis, n (%)                             | 1913 (17.1%)                | 44 (20.1%)                         | 0.256        |
| Chronic rhinitis, n (%)                              | 296 (2.6%)                  | 17 (7.8%)                          | <0.001       |
| Chronic sinusitis, n (%)                             | 97 (0.9%)                   | 7 (3.2%)                           | 0.005        |
| Nasal polyps, n (%)                                  | 251 (2.2%)                  | 17 (7.8%)                          | <0.001       |
| Chronic bronchitis, n (%)                            | 153 (1.4%)                  | 6 (2.7%)                           | 0.129        |
| COPD, n (%)                                          | 0 (0.0%)                    | 0 (0.0%)                           | 1.000        |
| Type 2 diabetes, n (%)                               | 552 (4.9%)                  | 21 (9.6%)                          | 0.005        |
| Hypertension, n (%)                                  | 2144 (19.2%)                | 64 (29.2%)                         | <0.001       |
| Ischaemic heart disease, n (%)                       | 528 (4.7%)                  | 20 (9.1%)                          | 0.007        |
| Cerebrovascular diseases, n (%)                      | 223 (2.0%)                  | 7 (3.2%)                           | 0.247        |
| Anxiety, n (%)                                       | 1087 (9.7%)                 | 25 (11.4%)                         | 0.414        |
| Depression, n (%)                                    | 1567 (14.0%)                | 41 (18.7%)                         | 0.057        |
| Osteoporosis, n (%)                                  | 143 (1.3%)                  | 12 (5.5%)                          | <0.001       |
| Inflammatory bowel disease, n (%)                    | 288 (2.6%)                  | 10 (4.6%)                          | 0.097        |

\*Adjusted for age and sex

BMI = Body Mass Index
